# Supplementary material for: Trends of Blood Lead Levels in US Pregnant Women: The National Health and Nutrition Examination Survey (2001–2018)
Source: PubMed Central journal article supplement (PMC9283785; doi:10.3389/fpubh.2022.922563), 2022-07-01
Supplement: Table_1.pdf [file Table_1.pdf]

**Supplement Table 1.** The blood lead from 2001-2002 to 2017-2018 cycle.

| Cycle interval | Blood lead level (ug/dL) |
|----------------|--------------------------|
| 2001-2002      | 0.97                     |
| 2003-2004      | 0.86                     |
| 2005-2006      | 0.74                     |
| 2007-2008      | 0.70                     |
| 2009-2010      | 0.71                     |
| 2011-2012      | 0.53                     |
| 2013-2014      | 0.47                     |
| 2015-2016      | 0.55                     |
| 2017-2018      | 0.53                     |
